# Supplementary material
Source: publisher figshare collection journal article supplement (https://acs.figshare.com/ndownloader/files/6452157)

**Synthesis of the core of the fungal metabolite benesudon - use of  
oxidative decarboxylation**

Derrick L. J. Clive,\* Minaruzzaman, and Haikang Yang

*Chemistry Department, University of Alberta, Edmonton, Alberta,  
Canada T6G 2G2*

e-mail: derrick.clive@ualberta.ca

**SUPPORTING INFORMATION**

Index

Preparation of **17** and characterization data page S2

Characterization data for **14**, **15**, **16**, **6**, **18**, **19** page S2

<sup>13</sup>C NMR spectra of **14** (less polar isomer),  
**14** (more polar isomer), **15-20**, **5**. page S6

**3-Oxohexahydrofuro[2,3-b]pyran-7a-carboxylic Acid (17).**

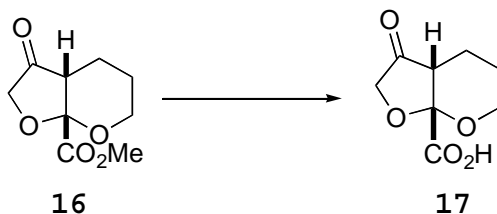

(Bu<sub>3</sub>Sn)<sub>2</sub>O (0.97 mL, 1.94 mmol) was added to a solution of **16** (96 mg, 0.48 mmol) in dry PhH (7.5 mL), and the solution was refluxed under N<sub>2</sub> for 5 h. The solvent was evaporated and EtOAc (10 mL) was added to the residue. The EtOAc solution was extracted with saturated aqueous NaHCO<sub>3</sub> solution (2 x 10 mL), and the aqueous extract was acidified (pH 1, pH paper) with ice-cold hydrochloric acid (2 N) and extracted with EtOAc (4 x 5 mL). The combined organic extracts were dried (Na<sub>2</sub>SO<sub>4</sub>) and evaporated. The resulting crude acid (**17**) should be used immediately, without further purification. If hydrolysis is continued for 4-5 h more, then the acid becomes first pink and then dark, and the overall yield of **18** after the oxidation is low. The acid was an oil and had: FTIR (CH<sub>2</sub>Cl<sub>2</sub>, cast) 3500-2500, 1766 cm<sup>-1</sup>; <sup>1</sup>H NMR (CDCl<sub>3</sub>, 400 MHz) δ 1.43-1.54 (m, 2 H), 1.90-2.01 (m, 1 H), 2.16-2.26 (m, 1 H), 2.89 (dd, *J* = 6.3, 3.4 Hz, 1 H), 1 H), 3.70-3.77 (m, 1 H), 3.94-4.02 (m, 1 H), 4.27 (AB q, Δ*v*<sub>AB</sub> = 25.2 Hz, *J* = 16.6 Hz, 2 H), 5.75 (br s, 1 H); <sup>13</sup>C NMR (CDCl<sub>3</sub>, 100.6 MHz) δ 19.9 (t), 21.0 (t), 47.0 (d), 65.0 (t), 70.5 (t), 101.8 (s), 169.5 (s), 210.5 (s); exact mass (HR electrospray) *m/z* calcd for C<sub>8</sub>H<sub>11</sub>O<sub>5</sub> (M + H) 187.0601, found 187.0603.

**3-Bromo-2-(prop-2-ynyloxy)tetrahydropyran-2-carboxylic Acid Methyl Ester (14).**

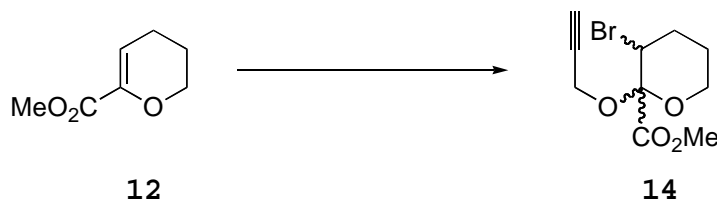

One isomer of **14** was an oil and had: FTIR (CH<sub>2</sub>Cl<sub>2</sub>, cast) 3286, 2126, 1755, cm<sup>-1</sup>; <sup>1</sup>H NMR (CDCl<sub>3</sub>, 400 MHz)  $\delta$  1.68-1.76 (m, 1 H), 1.86-2.00 (m, 1 H), 2.10-2.18 (m, 1 H), 2.36 (dq,  $J$  = 12.8, 4.1 Hz, 1 H), 2.45 (t,  $J$  = 2.5 Hz, 1 H), 3.76-3.83 [m, 4 H, including a singlet (3 H) at  $\delta$  3.80], 3.87 (dq,  $J$  = 12.4, 2.8 Hz, 1 H), 4.26 (dd,  $J$  = 12.4, 4.4 Hz, 1 H), 4.45 (d AB q,  $\Delta v_{AB}$  = 108.4 Hz,  $J$  = 15.6, 2.5 Hz, 2 H); <sup>13</sup>C NMR (CDCl<sub>3</sub>, 100.6 MHz)  $\delta$  26.9 (t), 29.2 (t), 48.4 (d), 52.2 (t), 52.9 (q), 61.9 (t), 74.3 (d), 79.6 (s), 98.9 (s), 167.3 (s); exact mass (HR electrospray)  $m/z$  calcd for C<sub>10</sub>H<sub>13</sub><sup>79</sup>BrNaO<sub>4</sub> (M + Na) 298.9889, found 298.9886.

The other isomer of **14** was an oil and had: FTIR (CH<sub>2</sub>Cl<sub>2</sub>, cast) 3282, 2124, 1761 cm<sup>-1</sup>; <sup>1</sup>H NMR (CDCl<sub>3</sub>, 500 MHz)  $\delta$  1.38-1.44 (m, 1 H), 1.97-2.05 (m, 1 H), 2.15-2.26 (m, 1 H), 2.44 (t,  $J$  = 2.4 Hz, 1 H), 2.45-2.54 (m, 1 H), 3.75-3.83 [m, 4 H, including a s (3 H) at  $\delta$  3.80], 3.89-3.96 (m, 1 H), 4.13 (d AB q,  $\Delta v_{AB}$  = 91.5 Hz,  $J$  = 15.4, 2.5 Hz, 2 H), 4.38 (t,  $J$  = 3.0 Hz, 1 H); <sup>13</sup>C NMR (CDCl<sub>3</sub>, 125.7 MHz)  $\delta$  18.9 (t), 26.9 (t), 48.9 (d), 52.1 (t), 52.7 (q), 62.2 (t), 74.7 (d), 78.4 (s), 98.0 (s), 167.2 (s); exact mass (HR electrospray)  $m/z$  calcd for C<sub>10</sub>H<sub>13</sub><sup>79</sup>BrNaO<sub>4</sub> (M + Na) 298.9889, found 298.9890.

**3-Methylenehexahydrofuro[2,3-*b*]pyran-7a-carboxylic Acid Methyl Ester (15).**

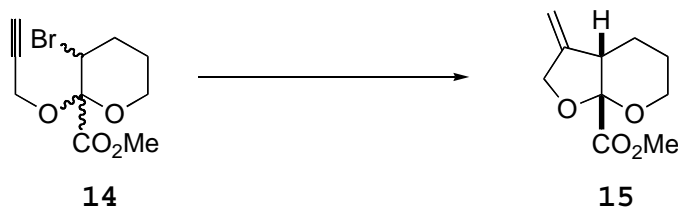

Compound **15** was an oil and had: FTIR (CH<sub>2</sub>Cl<sub>2</sub>, cast) 1742 cm<sup>-1</sup>; <sup>1</sup>H NMR (CDCl<sub>3</sub>, 500 MHz)  $\delta$  1.29-1.41 (m, 1 H), 1.63-1.76 (m, 1 H), 1.93-2.07 (m, 2 H), 3.03-3.08 (m, 1 H), 3.59-3.66 (m, 1 H), 3.80 (s, 3 H), 3.84-3.90 (m, 1 H), 4.55-4.65 (m, 2 H), 4.97 (q,  $J$  = 2.6 Hz, 1 H), 5.04 (q,  $J$  = 2.2 Hz, 1 H); <sup>13</sup>C NMR (CDCl<sub>3</sub>, 125.7

MHz)  $\delta$  19.7 (t), 22.2 (t), 43.0 (d), 52.6 (q), 64.5 (t), 71.3 (t), 103.3 (s), 104.6 (t), 146.4 (s), 168.7 (s); exact mass  $m/z$  calcd for  $C_{10}H_{14}O_4$  198.0892, found 198.0890.

**3-Oxohexahydrofuro[2,3-*b*]pyran-7a-carboxylic Acid Methyl Ester (16).**

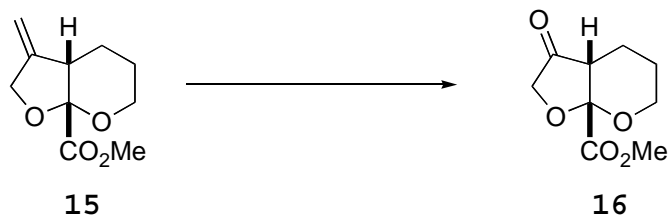

Compound **16** was an oil and had: FTIR ( $CH_2Cl_2$ , cast) 1765, 1742  $cm^{-1}$ ;  $^1H$  NMR ( $CDCl_3$ , 400 MHz)  $\delta$  1.40-1.50 (m, 2 H), 1.86-1.98 (m, 1 H), 2.19-2.28 (m, 1 H), 2.91 (dd,  $J$  = 6.1, 2.7 Hz, 1 H), 1 H), 3.54-3.65 (m, 1 H), 3.87 (s, 3 H), 3.90-3.98 (m, 1 H), 4.23 (AB q,  $\Delta\nu_{AB}$  = 19.8 Hz,  $J$  = 16.6 Hz, 2 H);  $^{13}C$  NMR ( $CDCl_3$ , 100.6 MHz)  $\delta$  19.9 (t), 21.0 (t), 47.6 (d), 53.0 (q), 64.9 (t), 70.4 (t), 102.4 (s), 167.6 (s), 211.1 (s); exact mass (HR electrospray)  $m/z$  calcd for  $C_9H_{12}NaO_5$  (M + Na) 223.5770, found 223.0581.

**5,6-Dihydro-4*H*-furo[2,3-*b*]pyran-3-one (6).**

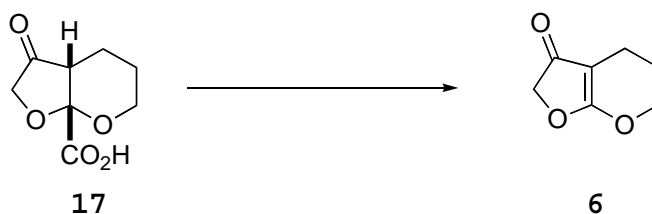

Compound **6** had: mp 60-62 °C; FTIR ( $CH_2Cl_2$ , cast) 1705, 1600  $cm^{-1}$ ;  $^1H$  NMR (300 MHz,  $CDCl_3$ )  $\delta$  1.91-1.99 (m, 2H), 2.33 (t,  $J$  = 6.2 Hz, 2H), 4.47 (apparent t,  $J$  = 5.1 Hz, 2H), 4.52 (s, 2H);  $^{13}C$  NMR (100 MHz,  $CDCl_3$ )  $\delta$  15.5 (t), 21.2 (t), 71.5 (t), 74.2 (t), 88.9 (s), 182.8 (s), 194.1 (s); exact mass  $m/z$  calcd for  $C_7H_8O_3$  140.0474, found 140.0473.

**2-Methyl-5,6-dihydro-4H-furo[2,3-b]pyran-3-one (18).**

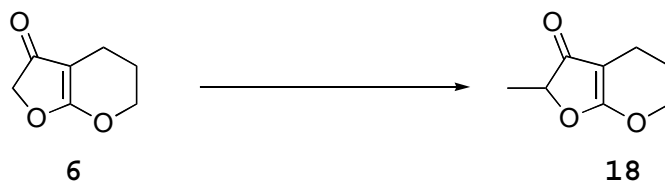

Compound **18** was an oil and had: FTIR ( $\text{CH}_2\text{Cl}_2$ , cast) 1699, 1598  $\text{cm}^{-1}$ ;  $^1\text{H}$  NMR (400 MHz,  $\text{CDCl}_3$ )  $\delta$  1.49 (d,  $J = 7.1$  Hz, 3H), 1.94 (apparent pentet,  $J = 6.3$  Hz, 2H), 2.32 (dt,  $J = 6.3, 3.2$  Hz, 2H), 4.45 (dt,  $J = 5.2, 1.0$  Hz, 2H), 4.59 (q,  $J = 7.1$  Hz, 1H);  $^{13}\text{C}$  NMR (100 MHz,  $\text{CDCl}_3$ )  $\delta$  15.6 (t), 16.3 (q), 21.3 (t), 71.4 (t), 82.5 (d), 87.5 (s), 181.4 (s), 196.9 (s); exact mass  $m/z$  calcd for  $\text{C}_8\text{H}_{10}\text{O}_3$  154.0630, found 154.0630.

**2-Methyl-2-phenylselenenyl-5,6-dihydro-4H-furo[2,3-b]pyran-3-one (19).**

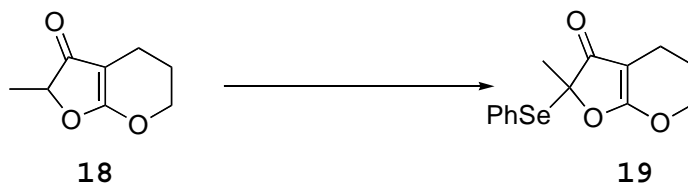

Compound **19** was a white solid and had: FTIR ( $\text{CH}_2\text{Cl}_2$ , cast) 1706, 1601  $\text{cm}^{-1}$ ;  $^1\text{H}$  NMR (400 MHz,  $\text{CDCl}_3$ )  $\delta$  1.40-1.51 (m, 1H), 1.69-1.84 (m containing a singlet, 5H in all), 2.06-2.14 (m, 1H), 4.06-4.12 (m, 1H), 4.24-4.20 (m, 1H), 7.28 (t,  $J = 7.5$  Hz, 2H), 7.37 (tt,  $J = 5.1, 1.2$  Hz, 1H), 7.63-7.68 (m, 2H);  $^{13}\text{C}$  NMR (100 MHz,  $\text{CDCl}_3$ )  $\delta$  15.3 (t), 21.1 (t), 21.9 (q), 71.4 (t), 88.0 (s), 91.9 (s), 125.4 (s), 128.7 (d), 129.4 (d), 137.5 (d), 179.0 (s), 194.1 (s); exact mass  $m/z$  calcd for  $\text{C}_{14}\text{H}_{14}\text{O}_3^{80}\text{Se}$  310.0108, found 310.0109.

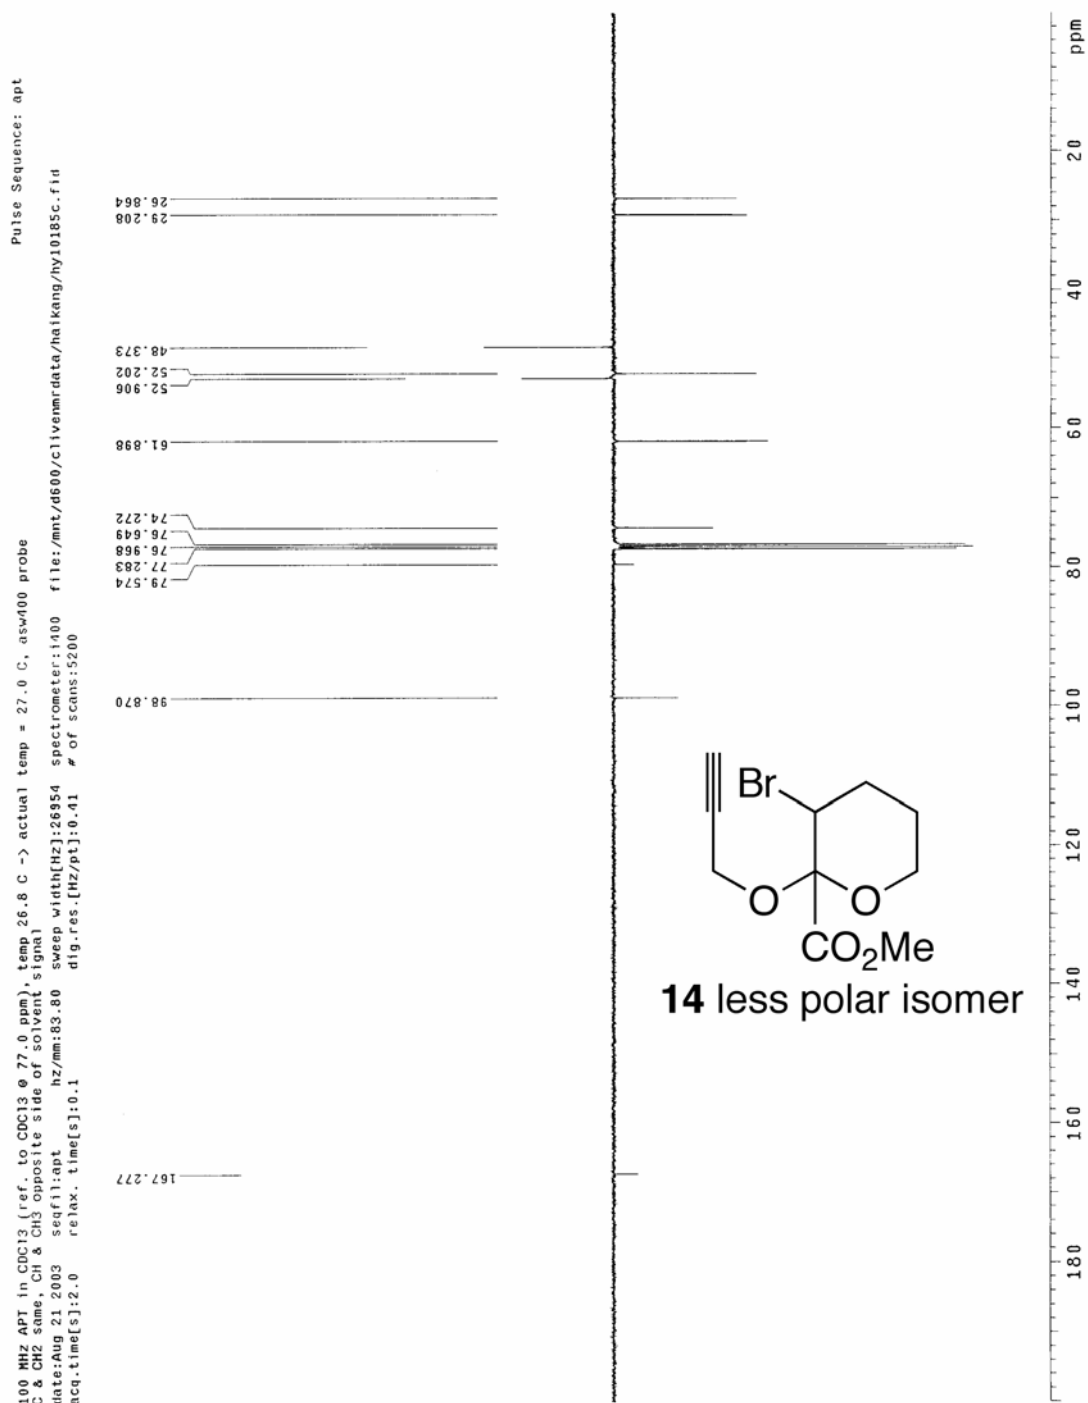

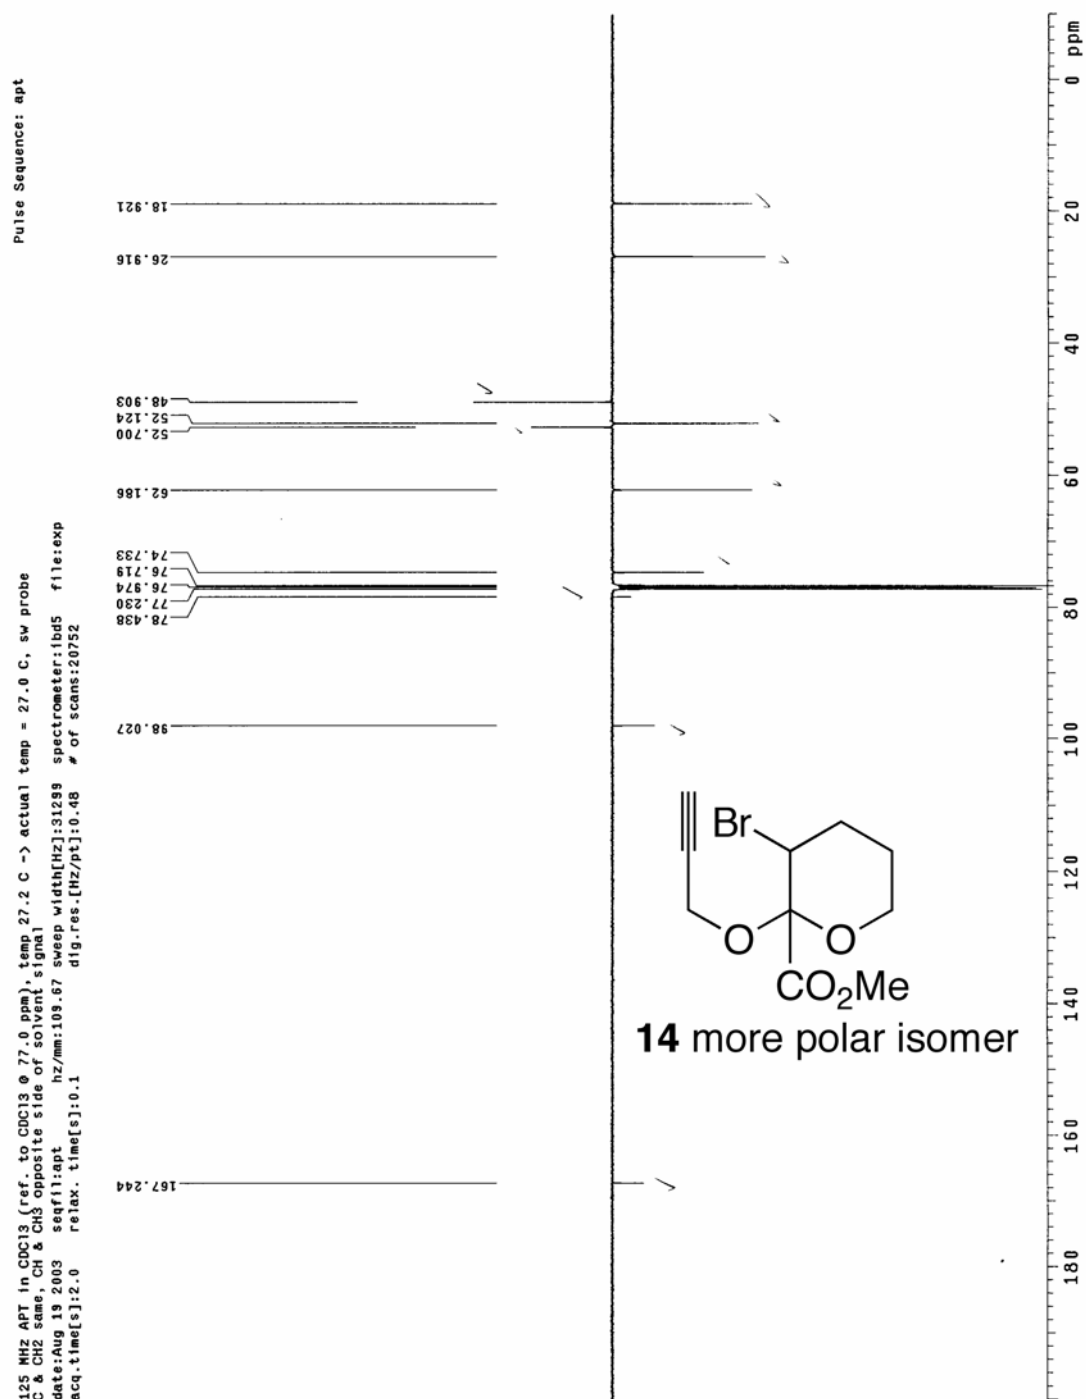

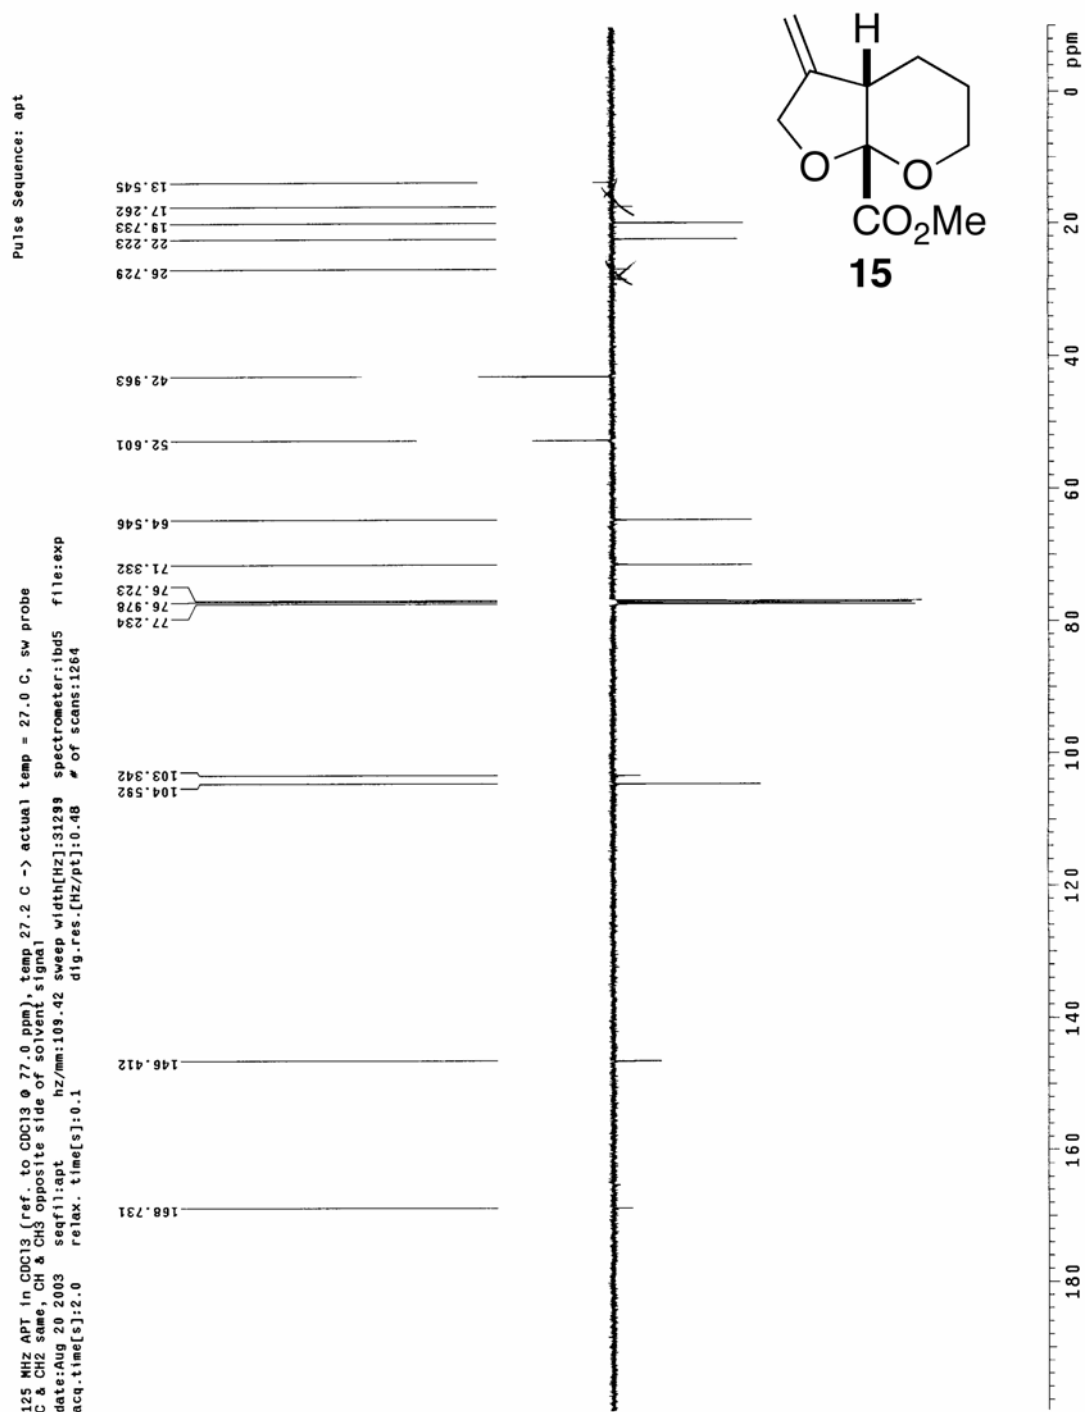



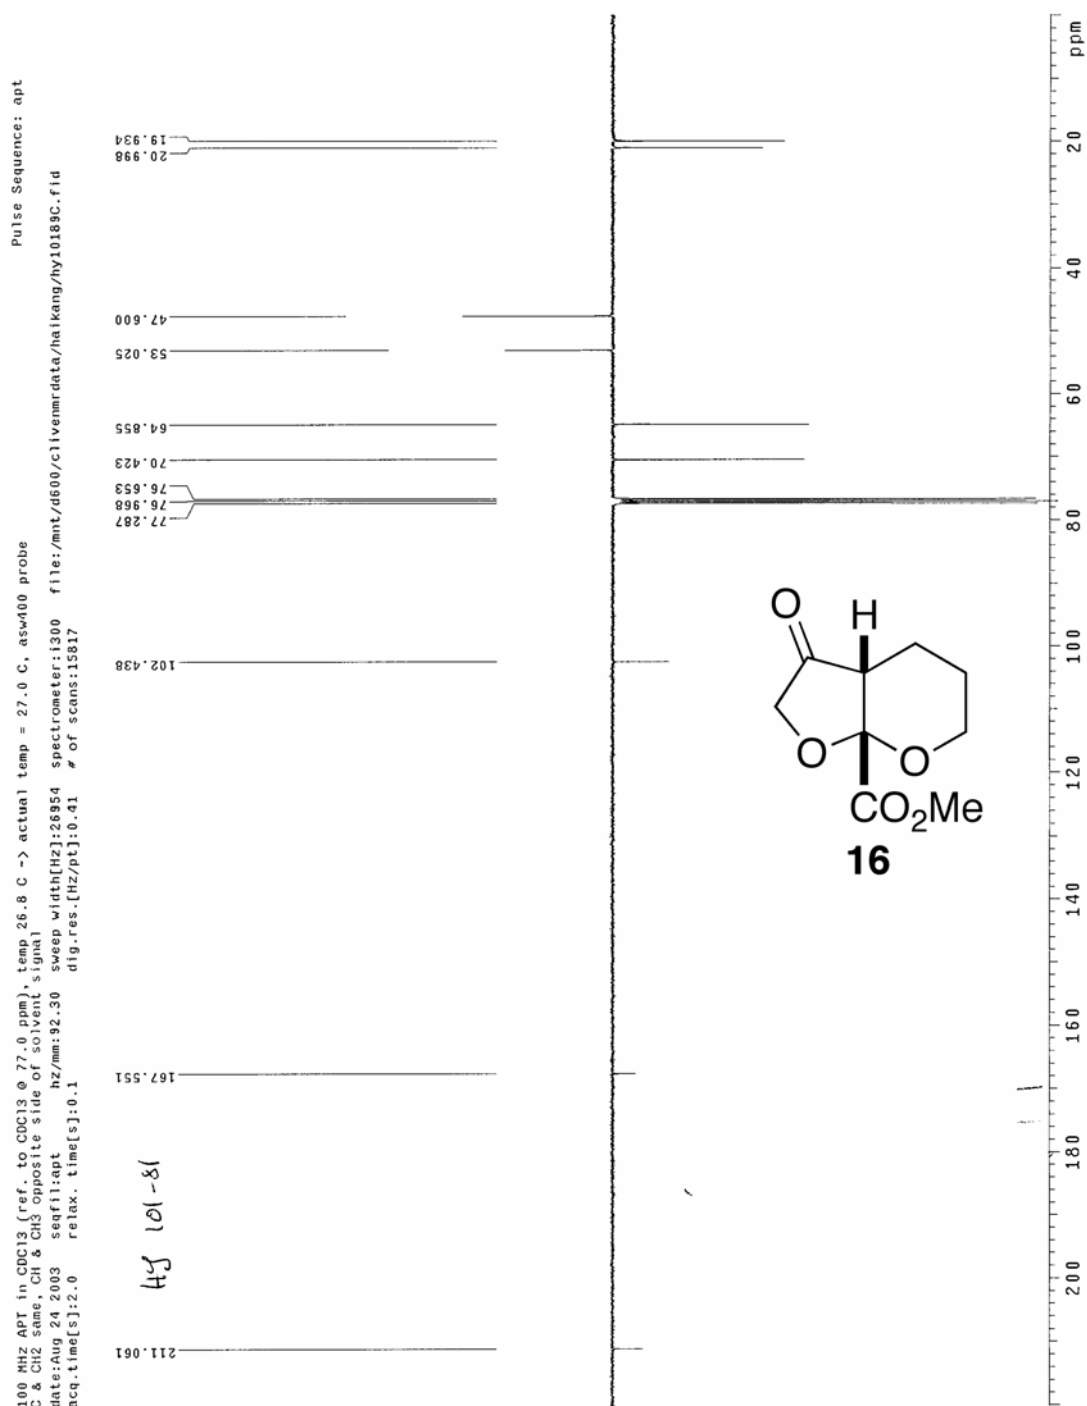

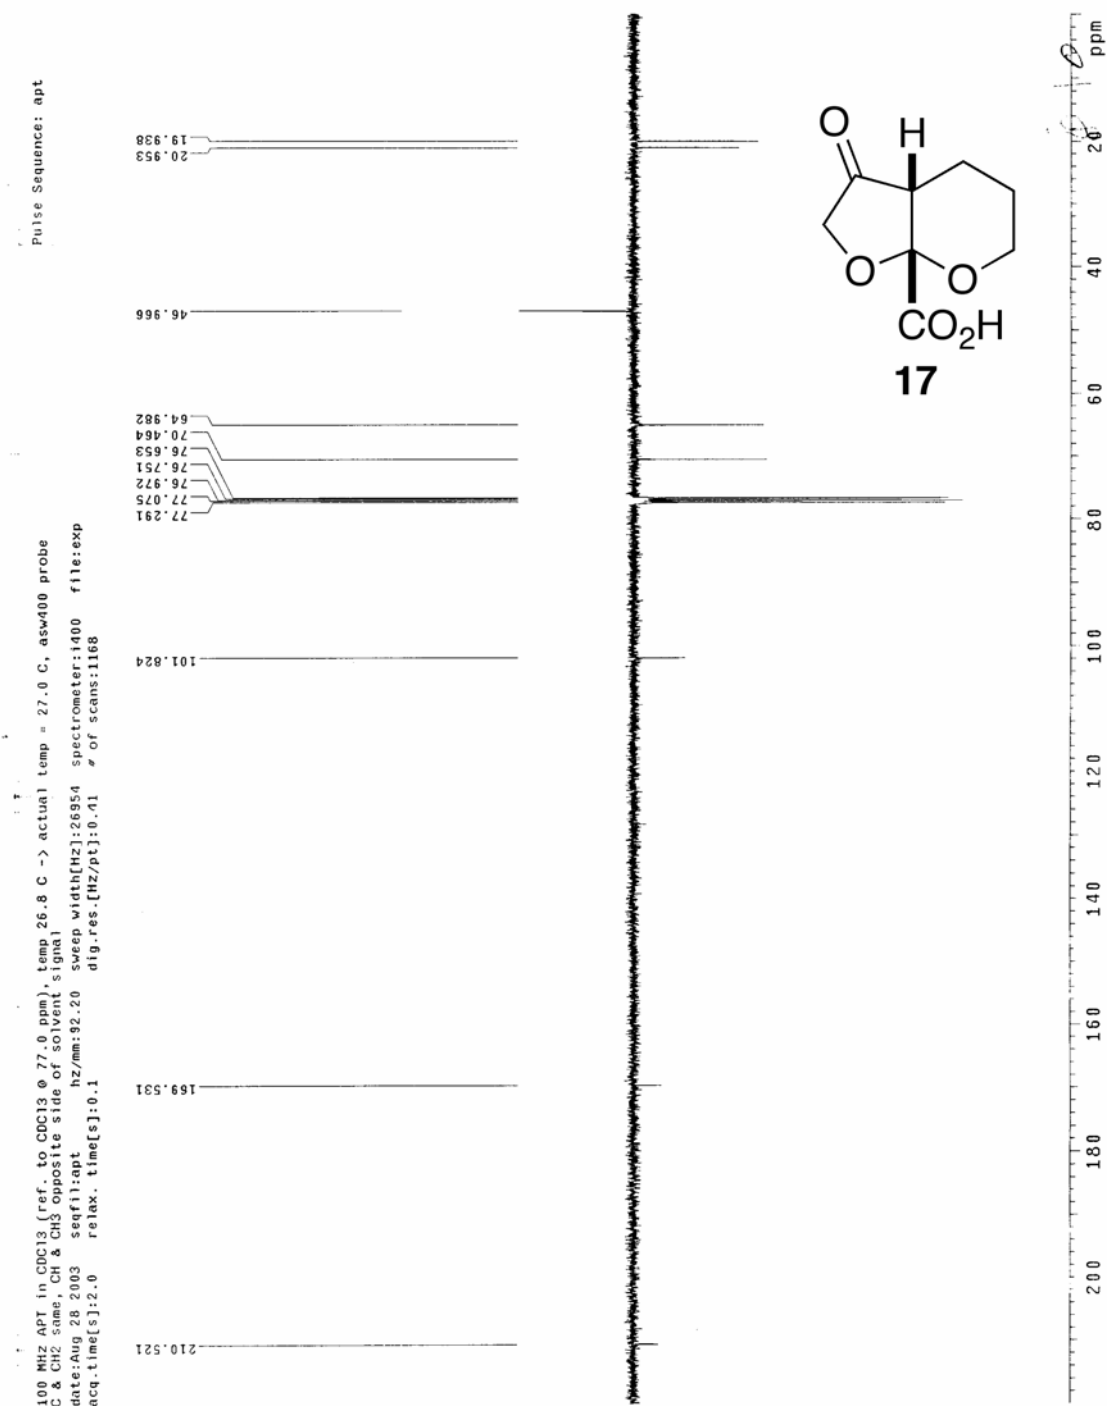

Pulse Sequence: apt

100 MHz APT in CDCl<sub>3</sub> (ref. to CDCl<sub>3</sub> @ 77.0 ppm), temp 26.8 C -> actual temp = 27.0 C, asw400 probe  
C & CH2 same, CH & CH3 opposite side of solvent signal  
date: feb 25 2005 seqfl: apt hz/mm: 112.31 sweep width[hz]: 26954 spectrometer: i400 file: exp  
acq.time[s]: 2.0 relax.time[s]: 0.1 dfg.res.[hz/pt]: 0.41 # of scans: 776

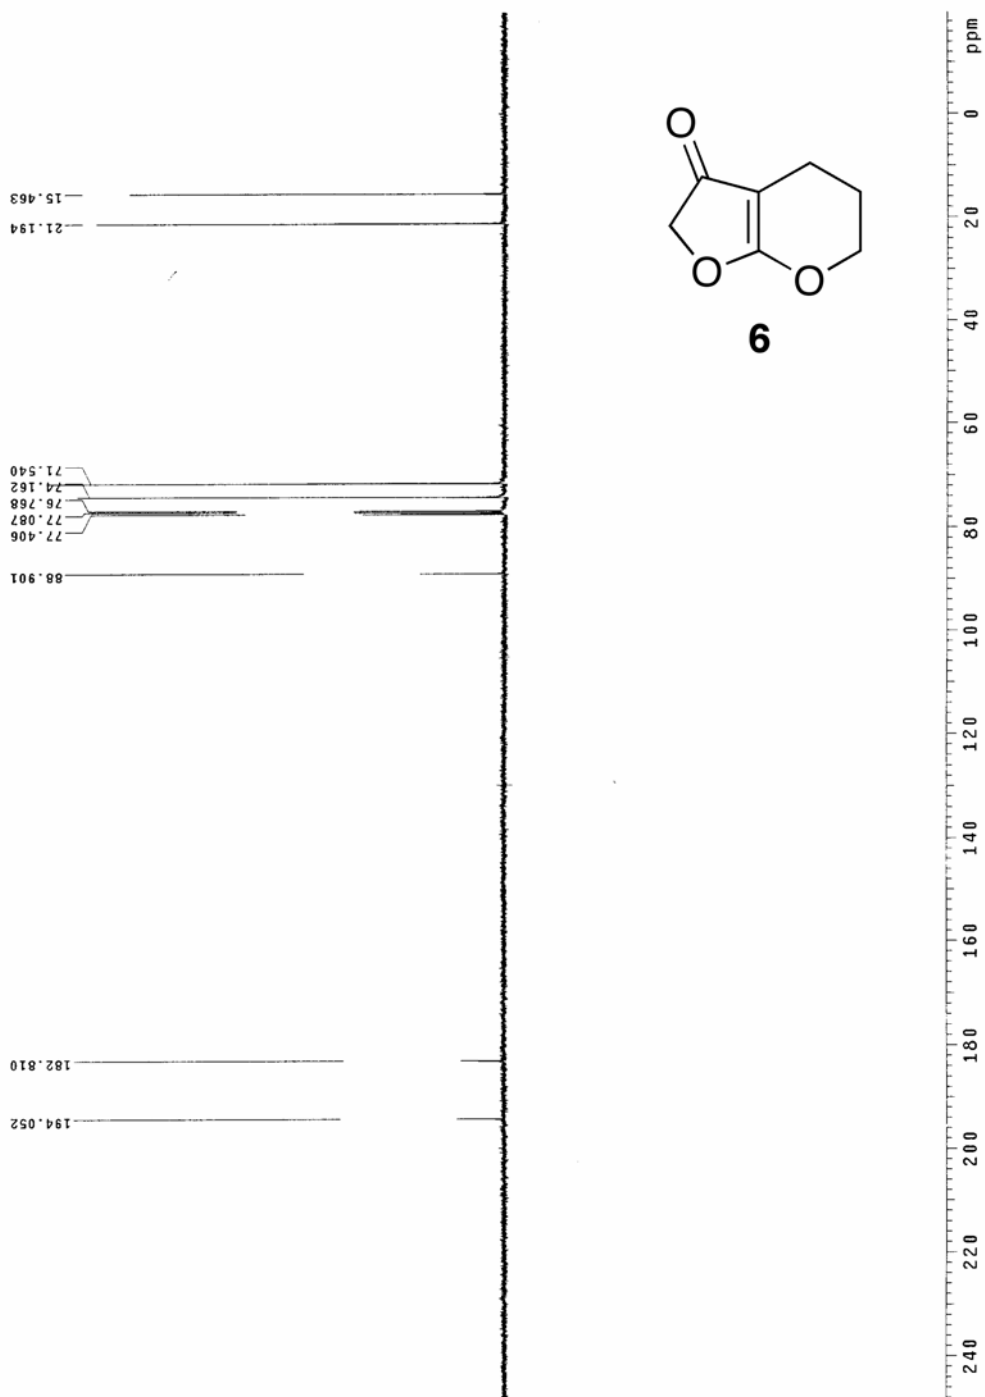

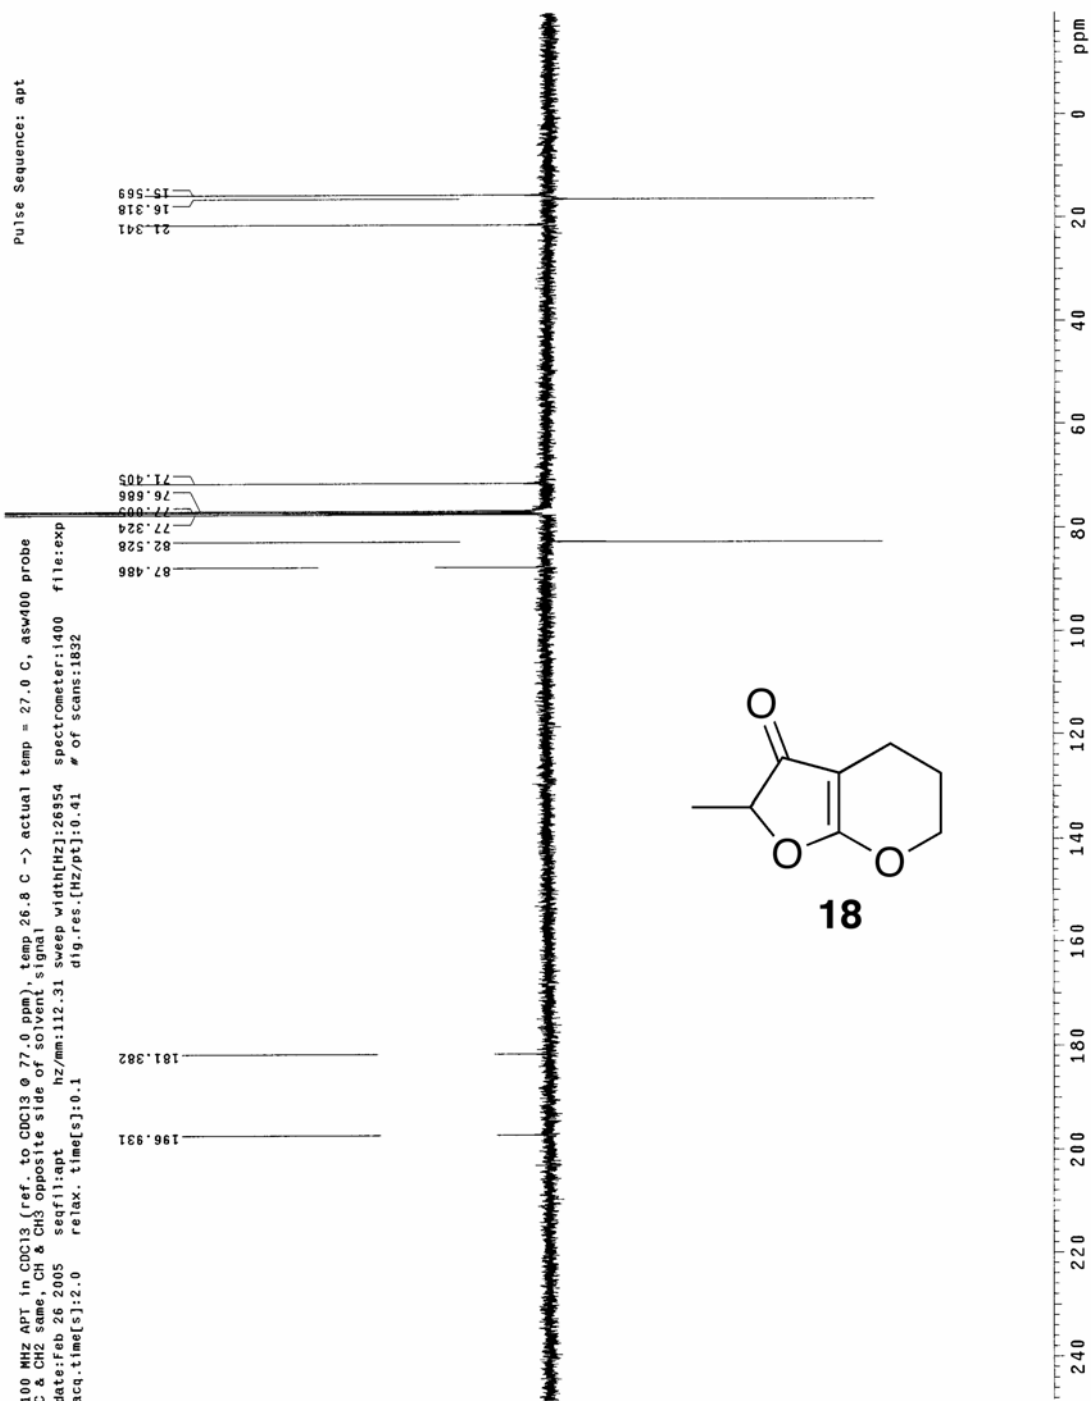

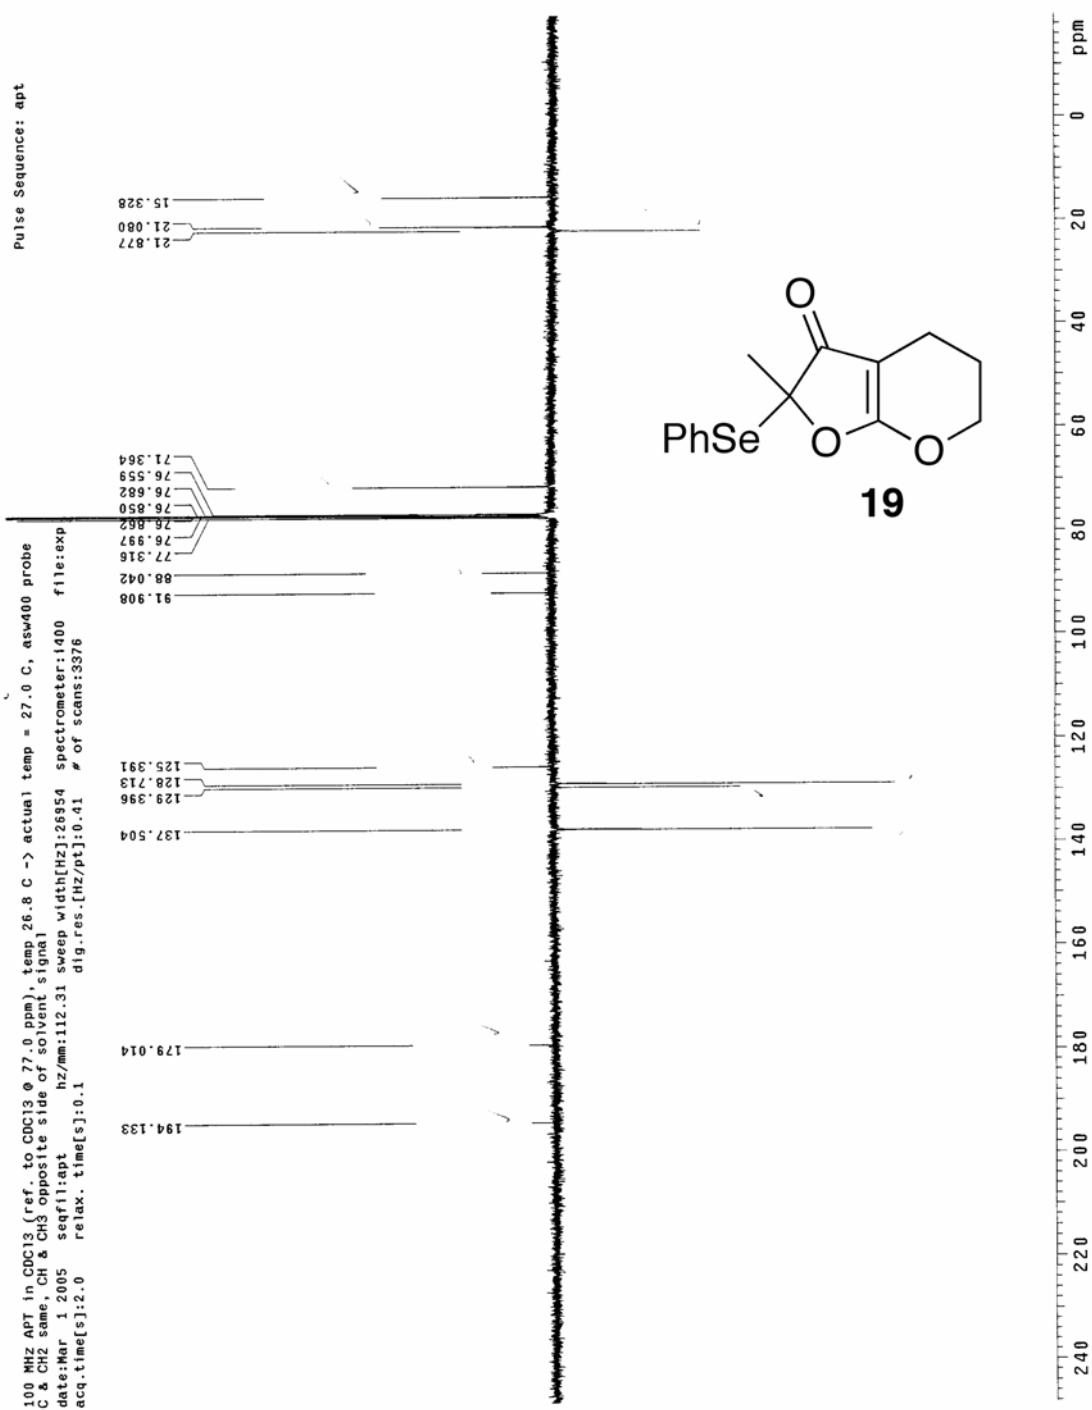

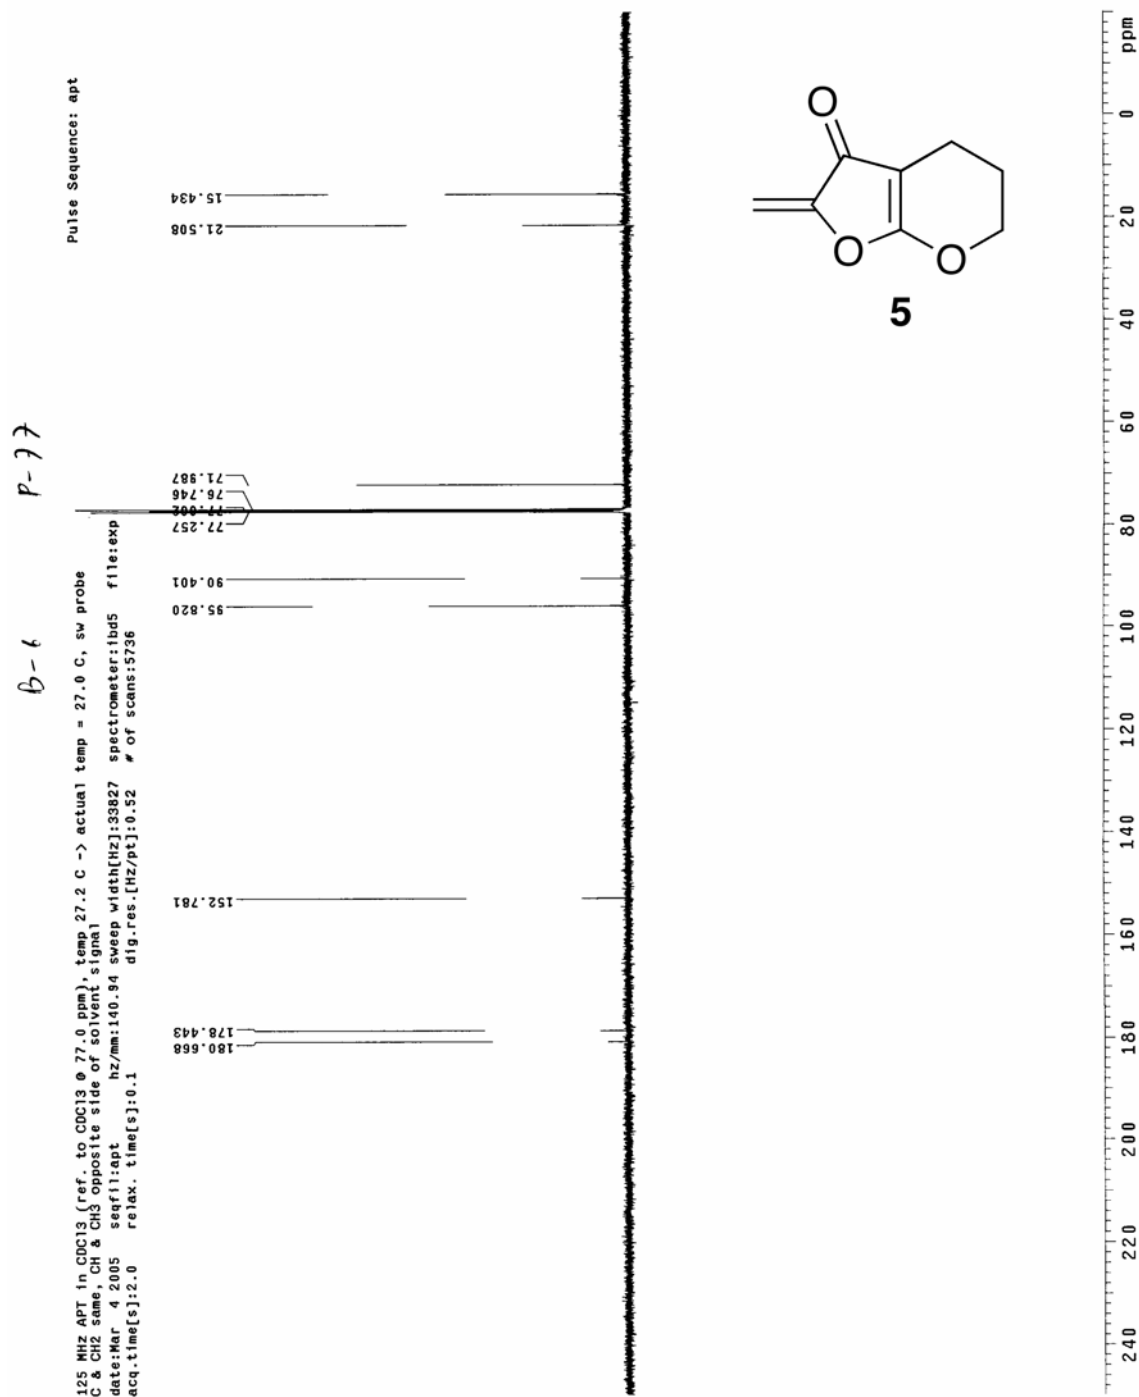

Supplement: Supplementary file 1 [file 6452157]
